# Supplementary material
Source: PubMed Central journal article supplement (PMC5945292)
Supplement: NIHMS879358-supplement-2013_Biochem_52_Supp.pdf [file NIHMS879358-supplement-2013_Biochem_52_Supp.pdf]

## Supporting Information

Structural Evidence: A Single Charged Residue Affects Substrate Binding in Cytochrome  
P450 BM-3

Jaclyn Catalano<sup>1</sup>, Kianoush Sadre-Bazzaz<sup>2</sup>, Gabriele A. Amodeo<sup>2</sup>, Liang Tong<sup>2</sup>, Ann  
McDermott<sup>1\*</sup>

<sup>1</sup>Department of Chemistry, Columbia University, 3000 Broadway, New York, New York  
10027

<sup>2</sup>Department of Biological Sciences, Columbia University, 1212 Amsterdam Ave, New  
York, New York 10027

|                |                                                      |
|----------------|------------------------------------------------------|
| R47K           | 5'-ctttaaattcgaggcgctggtaaggtaacgcgctacttatcaagtc-3' |
| R47K_antisense | 5'-gacttgataagtagcgcttacctaccaggcgctcgaatttaaag-3'   |

|                |                                          |
|----------------|------------------------------------------|
| R47Q           | 5'-attcgaggcgctggcaggtaacgcgctacttatc-3' |
| R47Q_antisense | 5'-gataagtagcgcttacctgaccaggcgctcgaat-3' |

|                |                                                   |
|----------------|---------------------------------------------------|
| R47E           | 5'-tttaaattcgaggcgctggtaggtaacgcgctacttatcaagt-3' |
| R47E_antisense | 5'-acttgataagtagcgcttacctaccaggcgctcgaatttaa-3'   |

Table S1 - Primers both forward (sense) and reverse (antisense) used to sequence R47K, R47Q, and R47E mutants of BM-3 and BMP.

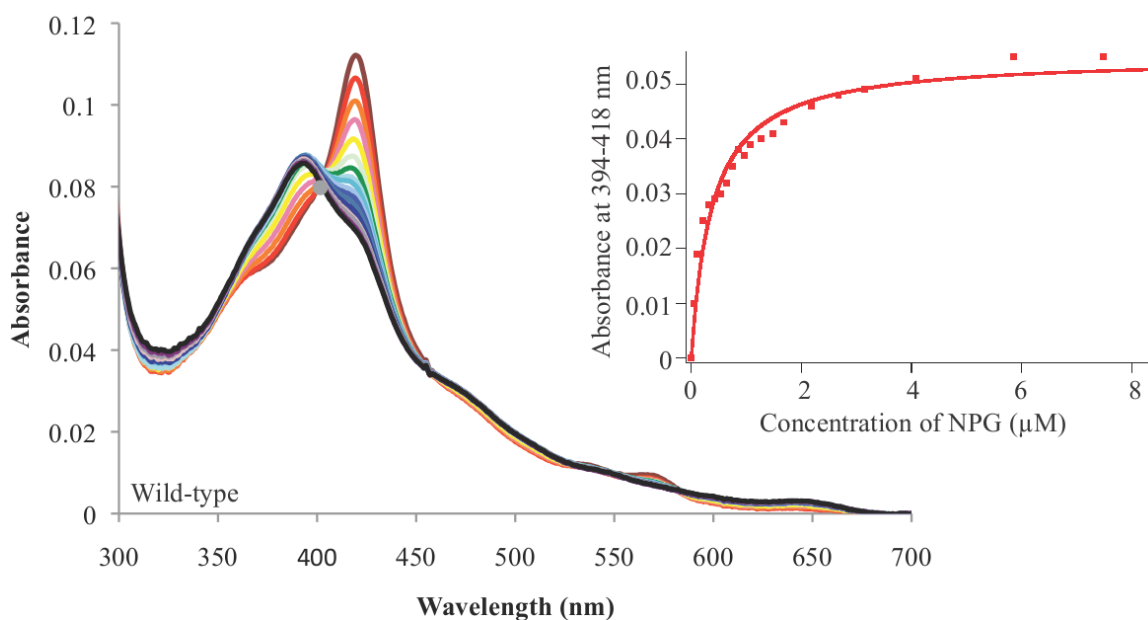

Figure S1 - Titration of NPG into BM-3 (wild-type) at room temperature. The dark red spectrum is at the start of the titration with zero NPG and the black spectrum is at saturation conditions of NPG. The optical absorption spectra of wild-type BM-3 has typical type 1 binding, an increase in absorbance at 394 nm upon the addition of NPG and a decrease at 418 nm indicating a change in spin state upon ligand binding. The inlay in the absorbance spectrum is the fit of the change in absorbance between 394nm and 418nm plotted against the change in concentration of NPG to determine the  $K_d$ . The  $K_d$  of wild-type was  $0.37 \pm 0.05 \mu\text{M}$ .

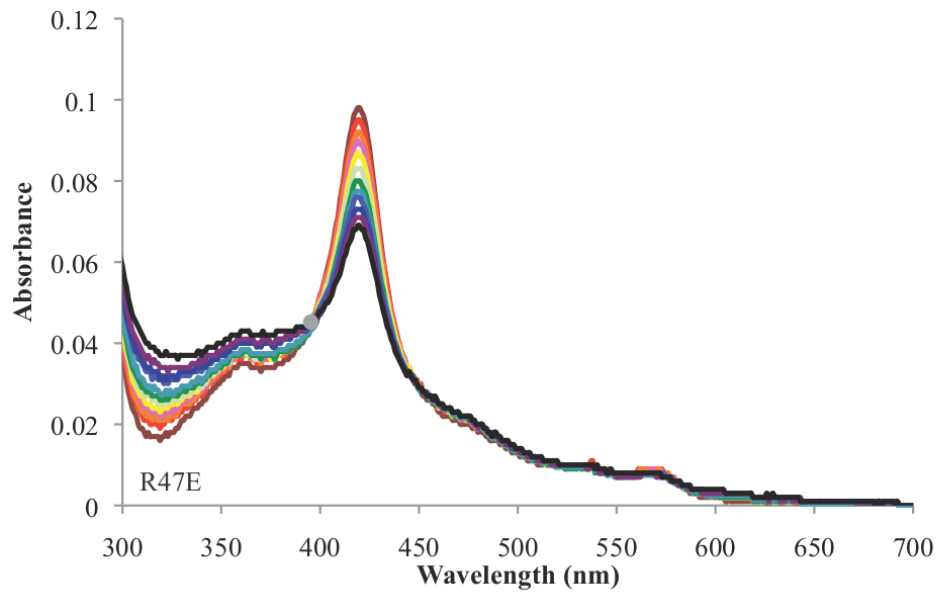

Figure S2 - Titration of NPG into R47E BM-3 at room temperature. The dark red spectrum is the start of the titration with zero NPG and the black spectrum is at saturation conditions of NPG. In the optical absorption spectra of R47E the same type I binding is not observed as in the wild-type and the isospectric point (gray circle) is different (wt 406 nm and R47E 399 nm), therefore a  $K_d$  was not determined.

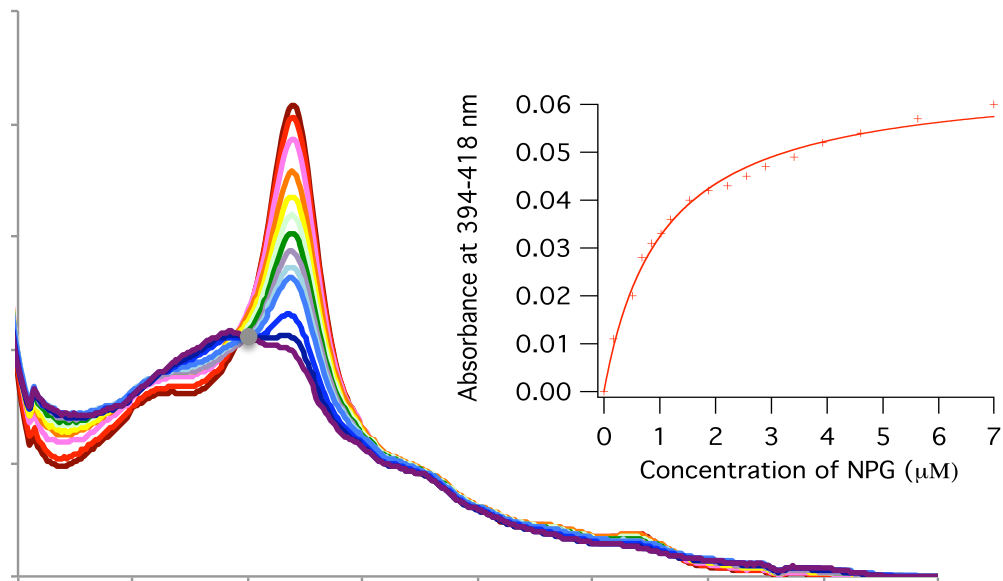

Figure S3 - Titration of NPG into R47K BM-3 at room temperature. The dark red spectrum is at the start of the titration with zero NPG and the purple spectrum is at saturation conditions of NPG. In the optical absorption spectra of R47K type I binding is observed with the same the isospectric point (gray circle) as the wild-type (406 nm). The inlay in the absorbance spectrum is the fit of the change in absorbance between 394nm and 418nm plotted against the change in concentration of NPG to determine the  $K_d$ . The  $K_d$  of  $1.2 \pm 0.1 \mu\text{M}$  for R47K was determined, which is three times weaker than the wild-type.

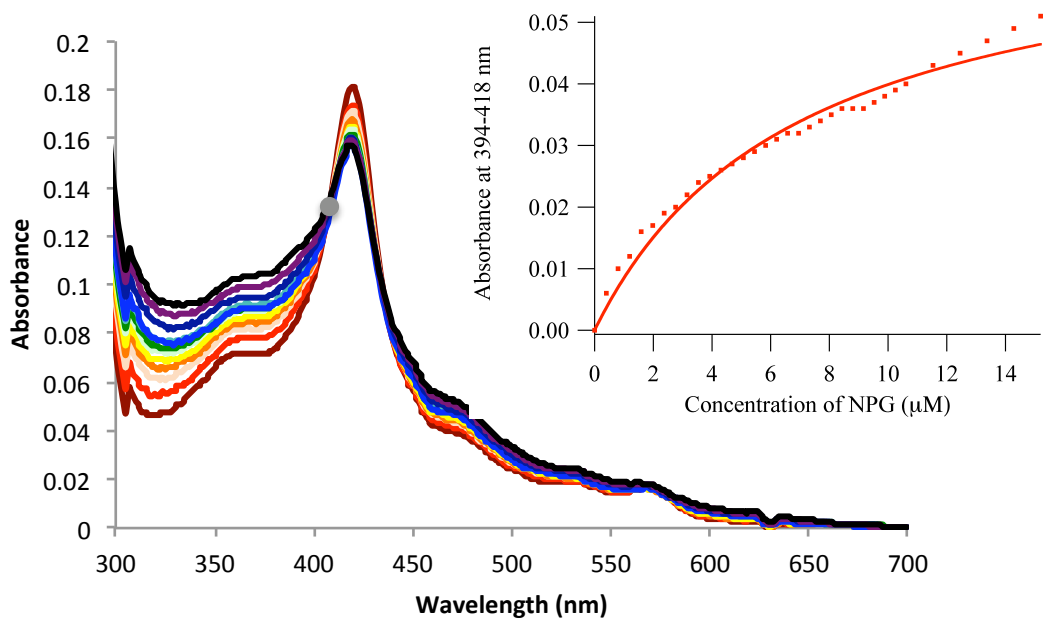

Figure S4 - Titration of NPG into R47Q BM-3 at room temperature. The dark red spectrum is the start of the titration with zero NPG and the black spectrum is at saturation conditions of NPG. In the optical absorption spectra of R47Q type I binding is observed with the same the isospectric point (gray circle) as the wild-type (406 nm). The inlay in the absorbance spectrum is the fit of the change in absorbance between 394nm and 418nm plotted against the change in concentration of NPG to determine the  $K_d$ . The  $K_d$  of  $7.0 \pm 0.7 \mu\text{M}$  for R47Q was determined, which is approximately twenty times weaker than the wild-type.

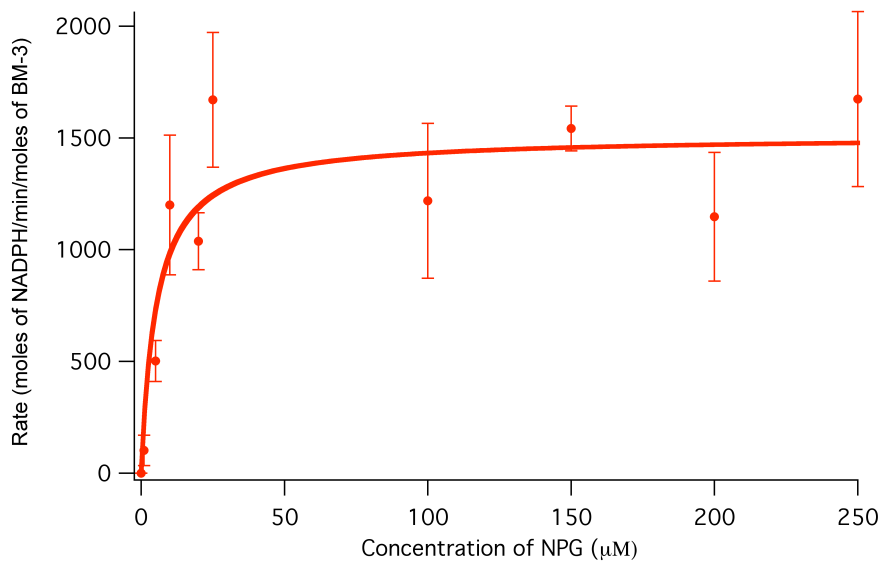

Figure S5- A fit of the rate of catalysis in moles of NADPH/min/moles of BM-3 versus the concentration of NPG. The  $K_m$  was determined at  $1500 \pm 140$  and  $k_{cat}$  at  $5 \pm 3$  for at room temperature.

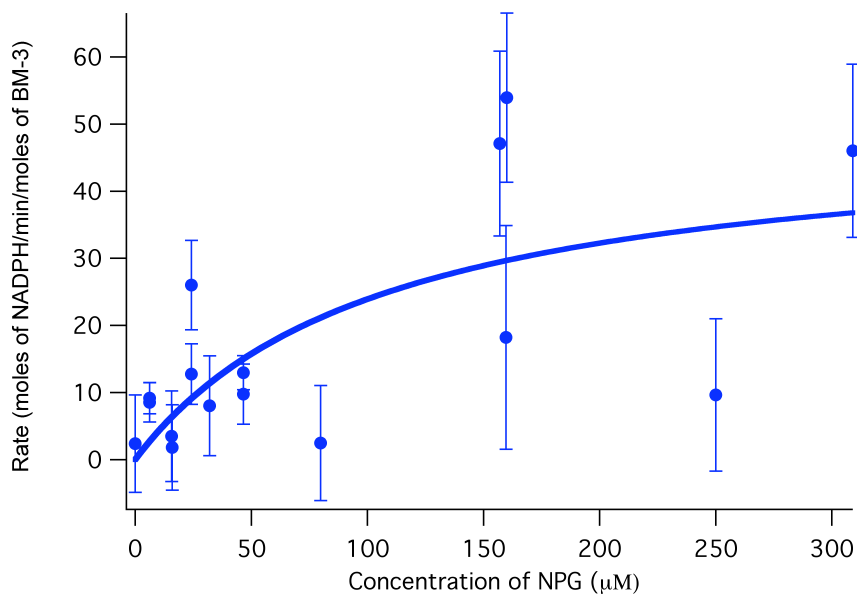

Figure S6- A fit of the rate of catalysis in moles of NADPH/min/moles of R47E BM-3 versus the concentration of NPG. The  $K_m$  was determined at  $90 \pm 24 \mu\text{M}$  and  $k_{\text{cat}}$  at  $42 \pm 8$  for R47E at room temperature. At low concentrations of NPG, barely any catalysis is occurring since non-coupled electron transfer was measured at  $5 \pm 4 \text{ min}^{-1}$ .



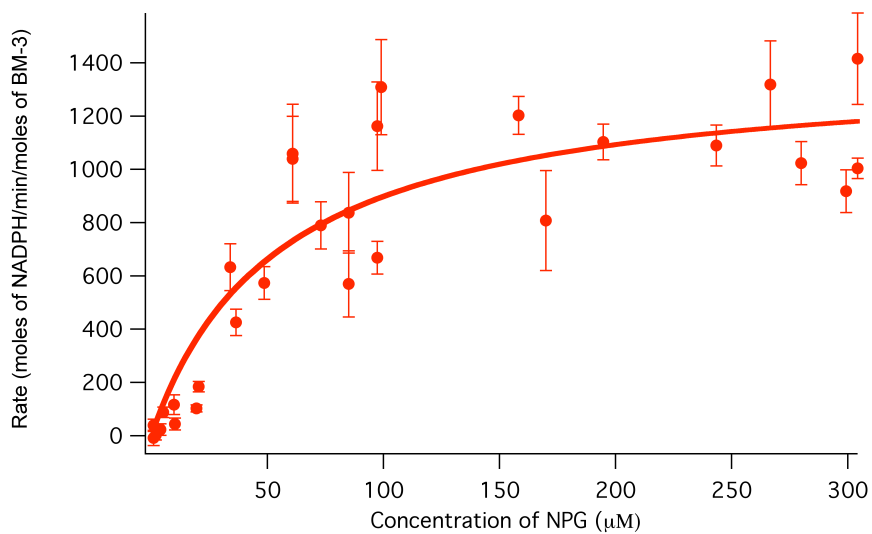

Figure S7- A fit of the rate of catalysis in moles of NADPH/min/moles of R47K BM-3 versus the concentration of NPG. The  $K_m$  was determined at  $55 \pm 17 \mu\text{M}$  and  $k_{\text{cat}}$  at  $1390 \pm 140$  for R47K at room temperature. The  $K_m$  was approximately ten times weaker than the wild-type. However, the  $k_{\text{cat}}$  was within error of the wild-type.

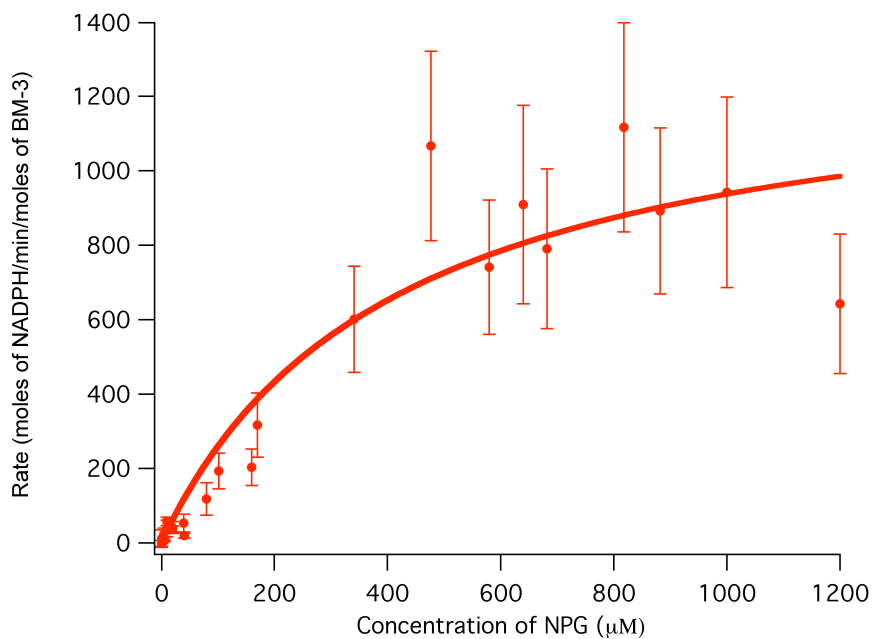

Figure S8- A fit of the rate of catalysis in moles of NADPH/min/moles of R47Q BM-3 versus the concentration of NPG. The  $K_m$  was determined at  $411 \pm 165 \mu\text{M}$  and  $k_{\text{cat}}$  at  $1320 \pm 214$  for R47Q at room temperature. The  $K_m$  was approximately eighty times weaker than the wild-type, showing R47's importance in binding. However, the  $k_{\text{cat}}$  was within error of the wild-type.
